# Supplementary material for: Cyanobacterial Contribution to Travertine Deposition in the Hoyoux River System, Belgium
Source: Springer Nature journal article supplement (doi:10.1007/s00248-017-0937-7), 2017-01-30
Supplement: MOESM1 [file 248_2017_937_MOESM1_ESM.pdf]

**Supplements to:**

**Cyanobacterial contribution to travertine deposition  
in the Hoyoux river system, Belgium**

Julia Kleinteich<sup>a,b</sup>, Stjepko Golubic<sup>a,d,e</sup>, Igor S. Pessi<sup>a</sup>, David Velazquez<sup>a,c</sup>, Jean-Yves Storme<sup>e</sup>,  
François Darchambeau<sup>f</sup>, Alberto V. Borges<sup>f</sup>, Philippe Compère<sup>g</sup>, Gudrun Radtke<sup>h</sup>, Seong-Joo Lee<sup>i</sup>,  
Emmanuelle J. Javaux<sup>e</sup>, Annick Wilmotte<sup>a</sup>

<sup>a</sup> InBios Center for Protein Engineering, University of Liège, B-4000 Liège, Belgium

<sup>b</sup> Center for Applied Geosciences, University of Tübingen, D-72074, Germany

<sup>c</sup> Department of Biology, Universidad Autónoma de Madrid, E-28049 Madrid, Spain

<sup>d</sup> Biological Science Center, Boston University, Boston, MA 02215, USA

<sup>e</sup> Palaeobiogeology, Palaeobotany, Palaeopalynology, Department of Geology, UR Geology B18, University of Liège, B-4000 Liège, Belgium

<sup>f</sup> Chemical Oceanography Unit, University of Liege, Institut de Physique (B5), B-4000 Liège, Belgium

<sup>g</sup> Department of Biology, Ecology and Evolution (BEE) / Centre of Aid for Research and Education in Microscopy (CAREM), University of Liège, B-4000 Liège, Belgium

<sup>h</sup> Hessisches Landesamt für Naturschutz, Umwelt und Geologie, Rheingastr. 186, D-65203 Wiesbaden, Germany

<sup>i</sup> Department of Geology, Kyungpook National University, 1370 Sankyuck-dong, Daegu, 702-701 Korea

\*corresponding author

## Supplemental Figures and Tables

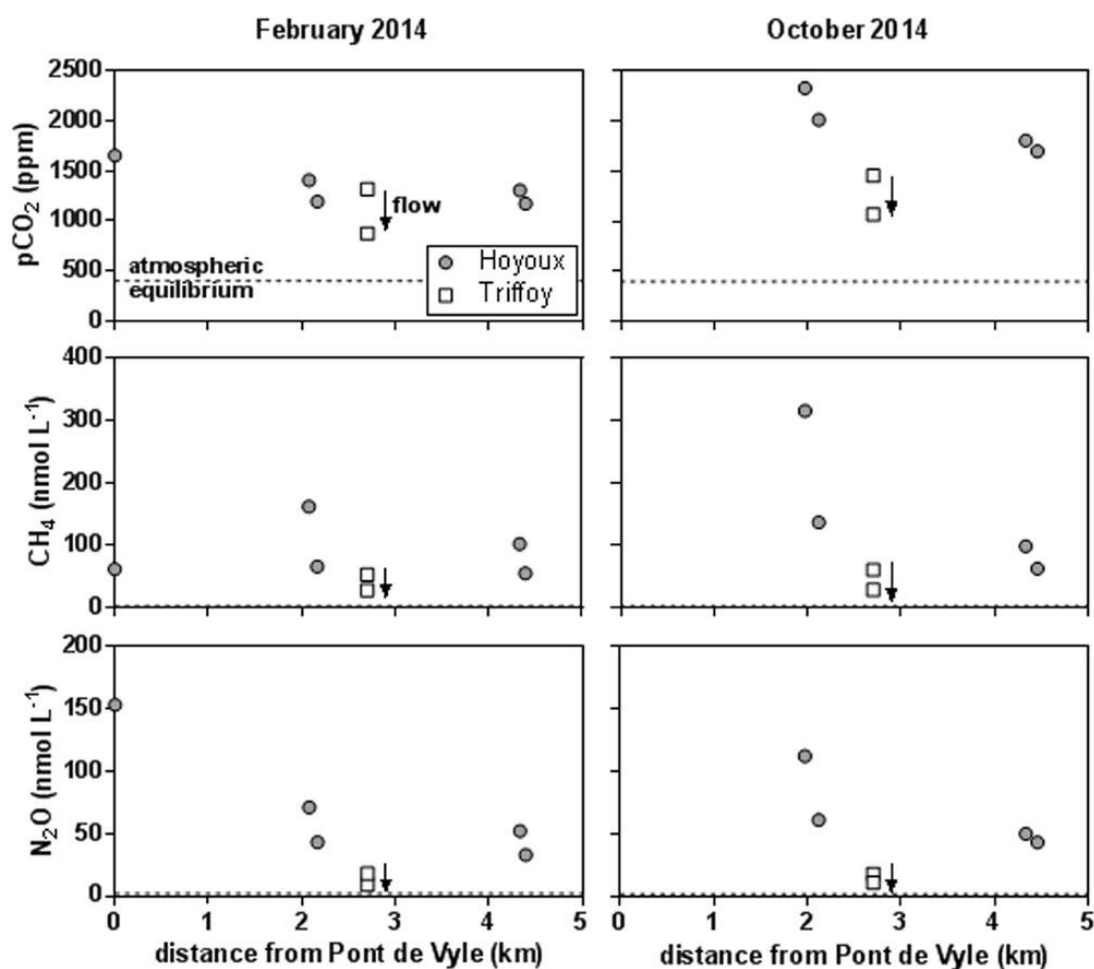

**Suppl. Figure 1:** Variations of the partial pressure of CO<sub>2</sub> (pCO<sub>2</sub>, ppm), CH<sub>4</sub> and N<sub>2</sub>O concentrations (nmol L<sup>-1</sup>) in the Hoyoux and Triffoy in February and October 2014. Horizontal dotted lines indicate atmospheric equilibrium, 400 ppm, 2 nmol L<sup>-1</sup> and 10 nmol L<sup>-1</sup> for CO<sub>2</sub>, CH<sub>4</sub> and N<sub>2</sub>O, respectively.

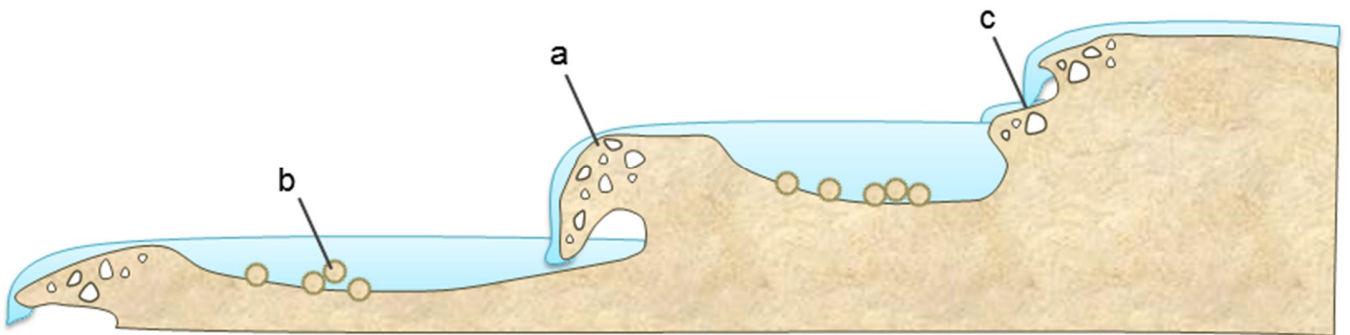

**Suppl. Figure 2:** Schematic view of a longitudinal profile of a travertine cascades in the Hoyoux River. Indicated are the different types of samples: (a) In the nearly laminar flow over the tops of travertine barriers, we observed poorly calcified flat mats; (b) in moderate flow between barriers and cascades, we collected oncoids and submersed encrusted wooden branches; (c) in cascades, on sites receiving high water impact, we encountered compact crusts with smooth surface of shiny appearance, blue-green to steel-blue in color which covered the travertine surface or encrusted fixed branches.

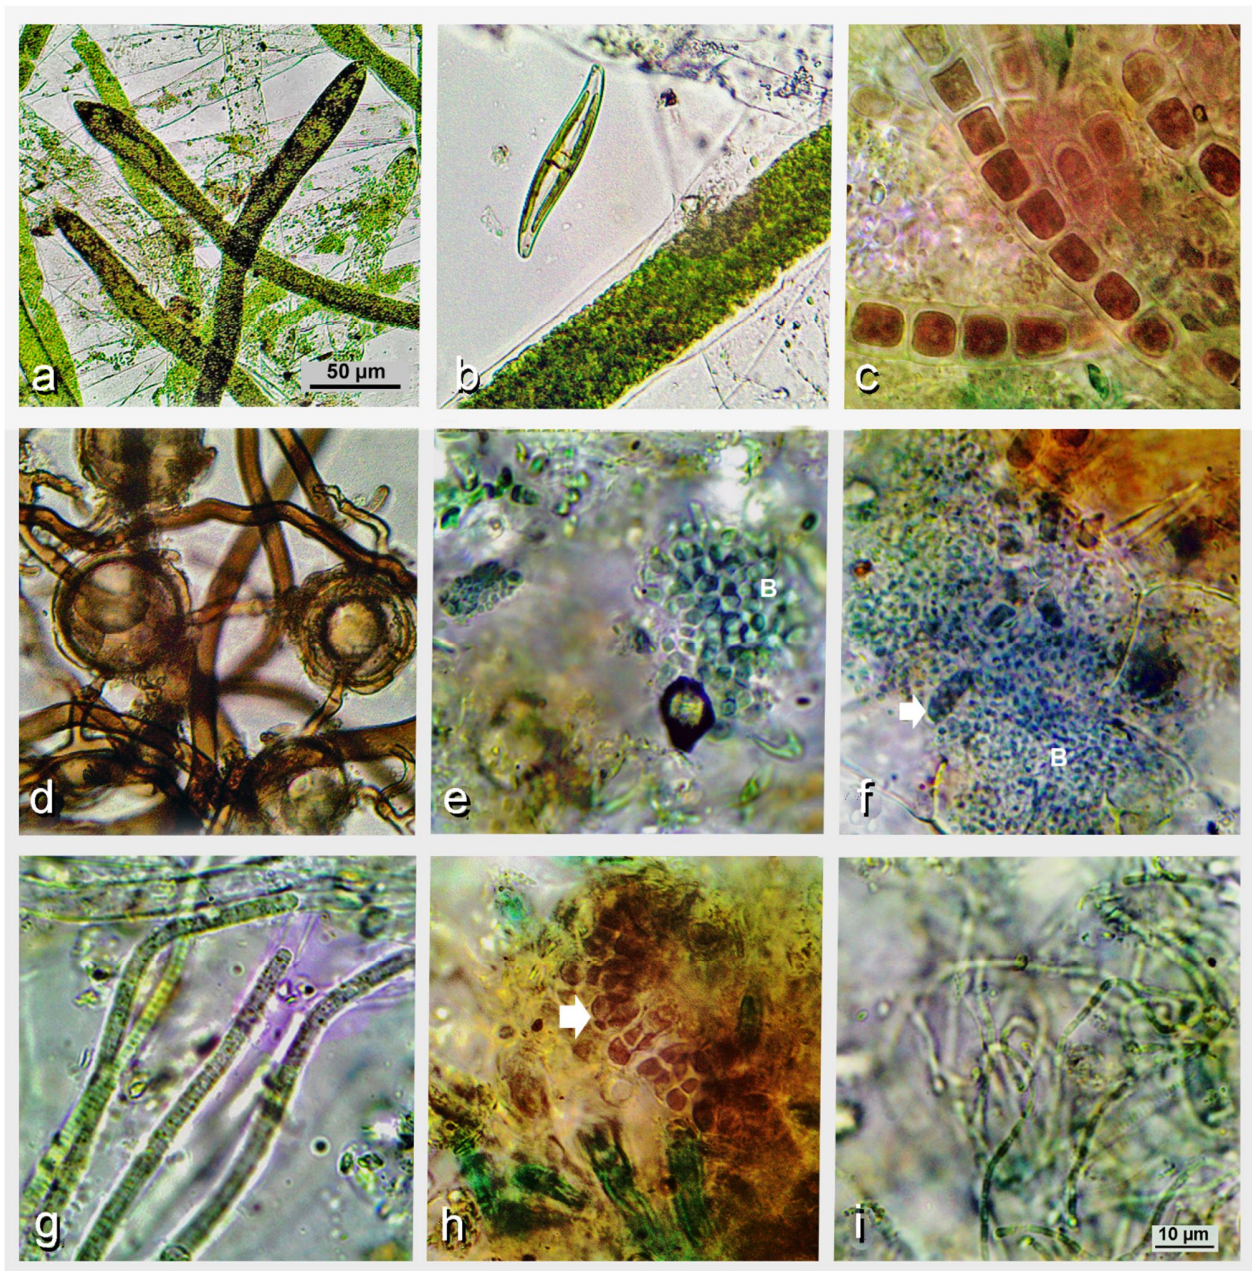

**Suppl. Fig. 3.** Microorganisms participating in Travertine deposition. (a) *Vaucheria* sp., filament tips (damaged filaments in background). (b) Detail: Diatom *Gyrosigma* sp. and *Vaucheria* sp. (c) The rhodophyte *Batrachospermum* sp., chnansia growth stage. (d) An oomycetous fungus entrapped in the travertine crust with germinating spores. (e) Clusters of settled baeocytes (B) of pleurocapsalean cyanobacteria (possibly *Xenococcus*). (f) The pleurocapsalean cyanobacterium *Hyella fontana* Huber et Jadin (arrow) surrounded by recently released baeocytes (B). (g) *Lyngbya* sp. extracted from carbonate crust. (h) *Xenococcus* sp. (arrow) (i) *Leptolyngbya* sp. The scale in i. is valid for b-i.



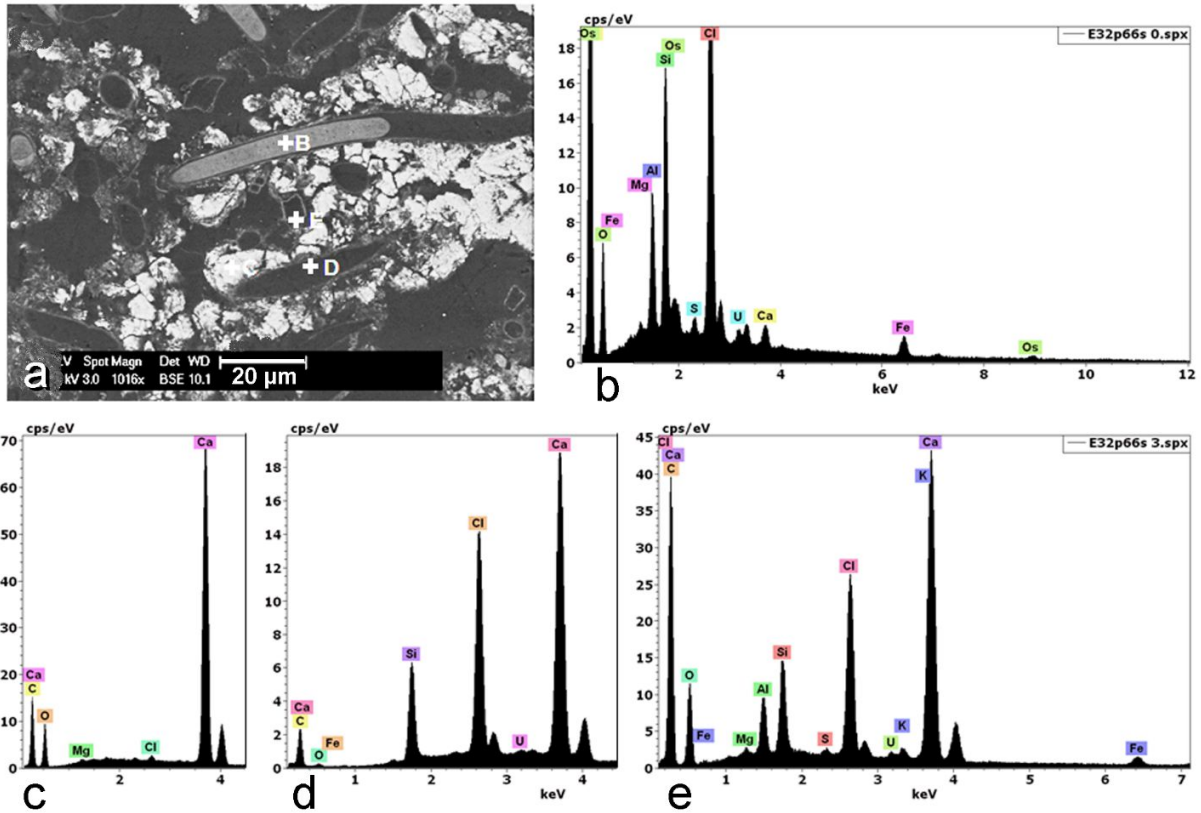

**Suppl. Fig. 4:** X-ray elemental analyses and mappings of *in situ* travertine with cyanobacteria and mineral encrustation. (a) The area subject to analysis (outlined by white frame in Fig. 9a, and mapped in Fig. 9d). (b) Elemental composition targeting the trichome of *Phormidium incrustatum* in a. (c) Target is carbonate cluster in a. (d) Target is abandoned *Phormidium* sheath in a. (e) Target is entrapped microorganisms in a.

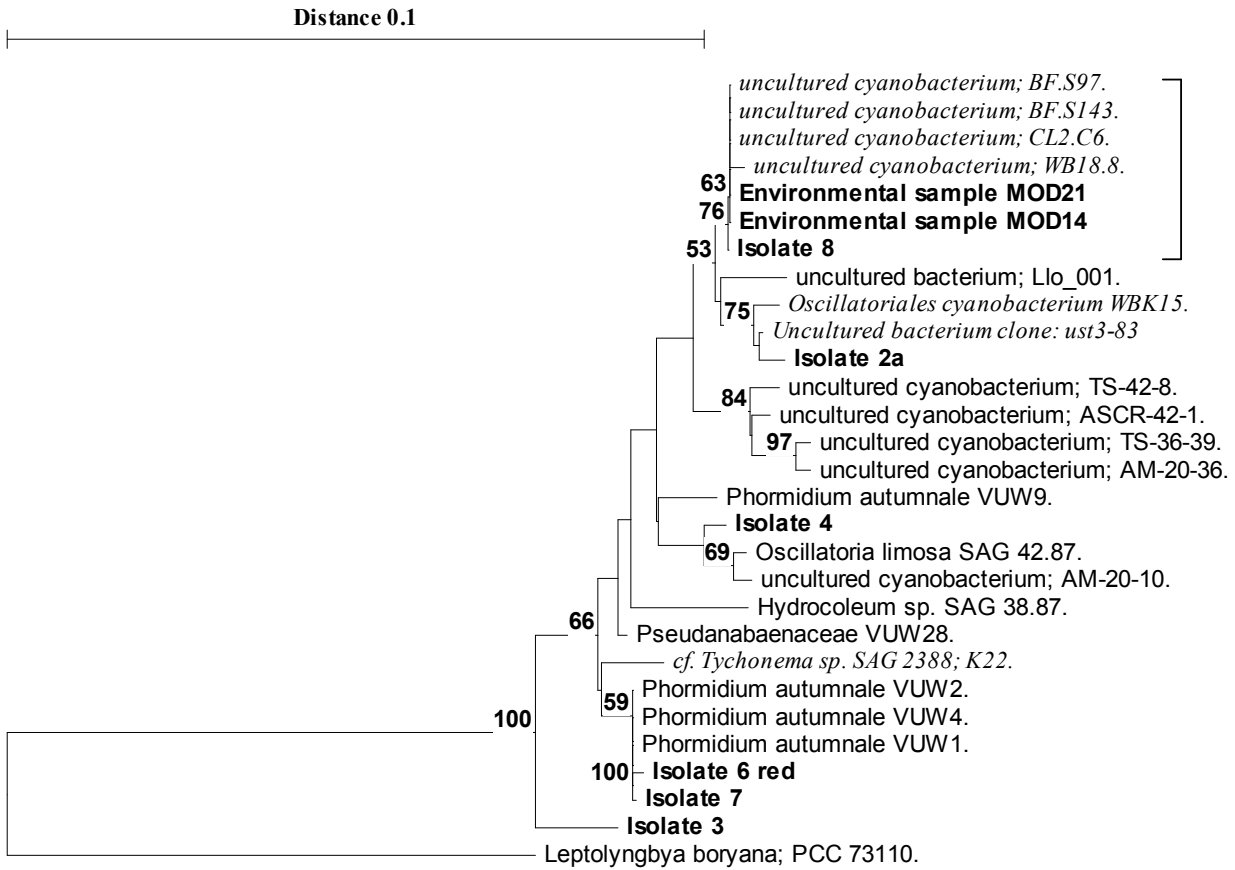

**Suppl. Fig. 5:** Neighbor-joining tree based on 454 bp of the 16S rRNA gene including environmental sequences and isolates from this study (**bold**), the most closely related BLAST hits as well as tufa-related sequences from Europe (*italics*). Kimura correction for multiple mutations with ratio calculated from data, 500 bootstraps.

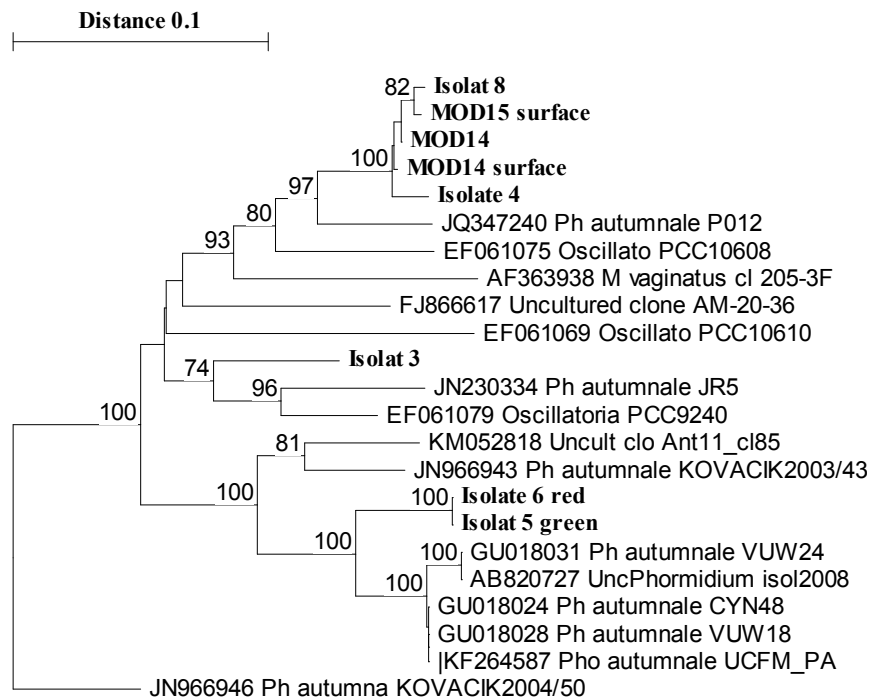

**Suppl. Fig. 6:** Neighbor-joining tree based on ITS sequences of environmental sequences and isolates (**bold**) and the most closely related BLAST hits. Kimura correction for multiple mutations, 500 bootstraps. No 'tufa' associated ITS sequences are available in public databases. Therefore, the sequences from the Hoyoux system of this study form a distinct cluster.

**Suppl. Table 1:** Amplified 16S rRNA and ITS sequences from environmental samples (MOD) and isolates. The length of the fragment, the 1<sup>st</sup> (closest) cultured and uncultured hit in the GenBank database obtained by a BLAST search are indicated, as well as the accession number.

| Sequence              | Sampling site               | fragment | # bp | 1st uncultured hit, accession # and pairwise identity     | 1st cultured hit, accession # and pairwise identity        | GenBank Accession # |
|-----------------------|-----------------------------|----------|------|-----------------------------------------------------------|------------------------------------------------------------|---------------------|
| <b>MOD 14</b>         | Site 3<br>Triffoy<br>June   | 16S rRNA | 1403 | Uncult. cyanobacterium clone WB 18.8<br>GQ324964<br>99.9% | <i>Oscillatoria limosa</i> SAG 42.87<br>KM019961<br>98.8%  | KR002126            |
| <b>MOD 14</b>         | Site 3<br>Triffoy<br>June   | ITS      | 531  | -                                                         | <i>Phormidium autumnale</i> PO12<br>JQ347240<br>91.6%      | KR002126            |
| <b>MOD 14 surface</b> | Site 3<br>Triffoy<br>June   | 16S rRNA | 1159 | Uncult. cyanobacterium clone WB 18.8<br>GQ324964<br>99.8% | <i>Phormidium autumnale</i> PO12<br>JQ712612<br>98.9%      | KR002127            |
| <b>MOD 14 surface</b> | Site 3<br>Triffoy<br>June   | ITS      | 531  | -                                                         | <i>Phormidium autumnale</i> PO12<br>JQ347240<br>91.5%      | KR002127            |
| <b>MOD 15</b>         | Site 2<br>Hoyoux<br>June    | 16S rRNA | 1144 | Uncult. cyanobacterium clone WB 18.8<br>GQ324964<br>99.2% | <i>Phormidium cf. subfuscum</i> l-Roc<br>EU196634<br>98.7% | KR002128            |
| <b>MOD 15</b>         | Site 2<br>Hoyoux<br>June    | ITS      | 531  | -                                                         | <i>Phormidium autumnale</i> PO12<br>JQ347240<br>90.3%      | KR002128            |
| <b>MOD 15 surface</b> | Site 2<br>Hoyoux<br>June    | 16S rRNA | 1161 | Uncult. cyanobacterium clone WB 18.8<br>GQ324964<br>99.5% | <i>Phormidium autumnale</i> PO12<br>JQ712612<br>98.9%      | KR002129            |
| <b>MOD 15 surface</b> | Site 2<br>Hoyoux<br>June    | ITS      | 543  | -                                                         | <i>Phormidium autumnale</i> PO12<br>JQ347240<br>91.0%      | KR002129            |
| <b>MOD 21</b>         | Site 3<br>Triffoy<br>August | 16S rRNA | 1315 | Uncult. cyanobacterium clone WB 18.8<br>GQ324964<br>99.8% | <i>Oscillatoria limosa</i> SAG 42.87<br>KM019961<br>99.1%  | KR002130            |
| <b>MOD 21</b>         | Site 3<br>Triffoy<br>August | ITS      | 531  | -                                                         | <i>Phormidium autumnale</i> PO12<br>JQ347240<br>91.9%      | KR002130            |



|                   |                               |          |      |                                                              |                                                                |          |
|-------------------|-------------------------------|----------|------|--------------------------------------------------------------|----------------------------------------------------------------|----------|
| <b>Isolate 2a</b> | Site 4<br>Hoyoux<br>February  | 16S rRNA | 1070 | -                                                            | <i>Phormidium autumnale</i> CYN79<br>JQ687337<br>99.4%         | KR002120 |
| <b>Isolate 2a</b> | Site 4<br>Hoyoux<br>February  | ITS      | 534  | Oscillatoriales cyanobacterium Fil.1SE<br>EF061076<br>93.6%  | <i>Phormidium autumnale</i> PO19<br>JQ347235<br>89.2%          | KR002120 |
| <b>Isolate 3</b>  | Site 3<br>Triffoy<br>February | 16S rRNA | 1403 | Uncult. cyanobacterium clone AM-20-10<br>FJ866615.1<br>99.1% | <i>Oscillatoria limosa</i> SAG 42.87<br>KM019961<br>99.1%      | KR002121 |
| <b>Isolate 3</b>  | Site 3<br>Triffoy<br>February | ITS      | 547  | -                                                            | <i>Oscillatoria</i> sp. PCC 9240<br>EF061079<br>90.5%          | KR002121 |
| <b>Isolate 4</b>  | Site 2<br>Hoyoux<br>February  | 16S rRNA | 1403 | Uncult. cyanobacterium clone AM-20-10<br>FJ866615.1<br>99.3% | <i>Oscillatoria limosa</i> SAG 42.87<br>KM019961<br>99.2%      | KR002122 |
| <b>Isolate 4</b>  | Site 2<br>Hoyoux<br>February  | ITS      | 543  | -                                                            | <i>Phormidium autumnale</i> PO12<br>JQ347240<br>90.7%          | KR002122 |
| <b>Isolate 5</b>  | Site 3<br>Triffoy<br>February | 16S rRNA | 1116 | -                                                            | <i>Phormidium autumnale</i> LCR-CYANT10<br>- KM052841<br>99.7% | n.a.     |
| <b>Isolate 6</b>  | Site 3<br>Triffoy<br>February | 16S rRNA | 1403 | Uncult. <i>Phormidium</i> sp.<br>AB820727<br>99.4%           | <i>Cf. Tychonema</i> sp. SAG 2388<br>KF417637<br>99.3%         | KR002123 |
| <b>Isolate 6</b>  | Site 3<br>Triffoy<br>February | ITS      | 560  | -                                                            | <i>Phormidium autumnale</i> CYN48<br>GU018024.1<br>93%         | KR002123 |
| <b>Isolate 7</b>  | Site 2<br>Hoyoux<br>February  | 16S rRNA | 706  | Uncult. <i>Phormidium</i> sp.<br>AB820727<br>99.6%           | <i>Phormidium cf. uncinatum</i><br>JX088095<br>99.6%           | KR002124 |
| <b>Isolate 8</b>  | Site 3<br>Triffoy<br>February | 16S rRNA | 1403 | Uncult. cyanobacterium clone WB18.8<br>GQ324964<br>99.8%     | <i>Oscillatoria limosa</i> SAG 42.87<br>KM019961<br>98.8%      | KR002125 |
| <b>Isolate 8</b>  | Site 3<br>Triffoy<br>February | ITS      | 552  | -                                                            | <i>Phormidium autumnale</i> PO12<br>JQ347240<br>90.7%          | KR002125 |
